# Supplementary material for: Molecular Characterization of Appendiceal Goblet Cell Carcinoid
Source: Oxford University Press journal article supplement (doi:10.1158/1535-7163.mct-20-0318), 2020-10-09
Supplement: 15357163mct200318-sup-241873_2_supp_6526767_qf4th9.docx [file 15357163mct200318-sup-241873_2_supp_6526767_qf4th9.docx]

**The methods in assessing microsatellite instability (MSI) and mismatch repair (MMR) status**

MSI/MMR status was assessed by three platforms as follows.

1. Immunohistochemistry: MLH1, MSH2, MSH6 and PMS2 proteins

- Positive staining of all four MMR proteins = MMR proficient (pMMR)
- Negative staining for at least one MMR protein = MMR deficient (dMMR)

2. Fragment analysis

- Positive = MSI high (MSI-H)
- Negative = microsatellite stable (MSS)

3. Next-generation sequencing

- Positive = MSI-H
- Negative = MSS

Results are prioritized based on the numbering above for any discordance between platforms for reported MSI/MMR status.
